# Supplementary material for: Does von Willebrand factor improve the predictive ability of current risk stratification scores in patients with atrial fibrillation?
Source: PubMed Central journal article supplement (PMC5278507; doi:10.1038/srep41565), 2017-01-30
Supplement: srep41565-s1.pdf [file srep41565-s1.pdf]

**Does von Willebrand factor improve the predictive ability of current risk stratification scores in patients with atrial fibrillation?**

Amaya García-Fernández<sup>1</sup>, MD, PhD; Vanessa Roldán<sup>2</sup>, MD, PhD; José Miguel Rivera-Caravaca<sup>3</sup>, MSc, RN; Diana Hernández-Romero<sup>3</sup>, PhD; Mariano Valdés<sup>3</sup>, MD, PhD; Vicente Vicente<sup>2</sup>, MD, PhD; Gregory Y H Lip<sup>\*4</sup>, MD; Francisco Marín<sup>\*3</sup>, MD, PhD.

[\*joint senior authors]

<sup>1</sup>Cardiology Service, Alicante University General Hospital, Alicante Institute for Health and Biomedical Research (ISABIAL - FISABIO Foundation), Alicante, Spain.

<sup>2</sup>Department of Hematology and Clinical Oncology. Morales Meseguer University Hospital. University of Murcia. Biohealth Research Institute Virgen de la Arrixaca, IMIB-Arrixaca. Murcia, Spain.

<sup>3</sup>Department of Cardiology. Virgen de la Arrixaca University Hospital. University of Murcia. Biohealth Research Institute Virgen de la Arrixaca, IMIB-Arrixaca. Murcia, Spain.

<sup>4</sup>University of Birmingham Institute of Cardiovascular Sciences. City Hospital, University of Birmingham, Birmingham, United Kingdom, and Aalborg Thrombosis Research Unit, Department of Clinical Medicine, Aalborg University, Aalborg, Denmark.

**Corresponding author**

Vanessa Roldán

Department of Hematology and Clinical Oncology

Hospital Universitario Morales Meseguer

Av Marqués de los Vélez, s/n, 30008 Murcia

Tel: 0034 968 36 09 00 e-mail: vroidans@gmail.com

**ONLINE SUPPLEMENT**

**Supplemental Figure.**

**Figure I.** Kaplan-Meier analysis for each adverse event in relation to vWF levels.

(A) Composite of cardiovascular events<sup>1</sup>.

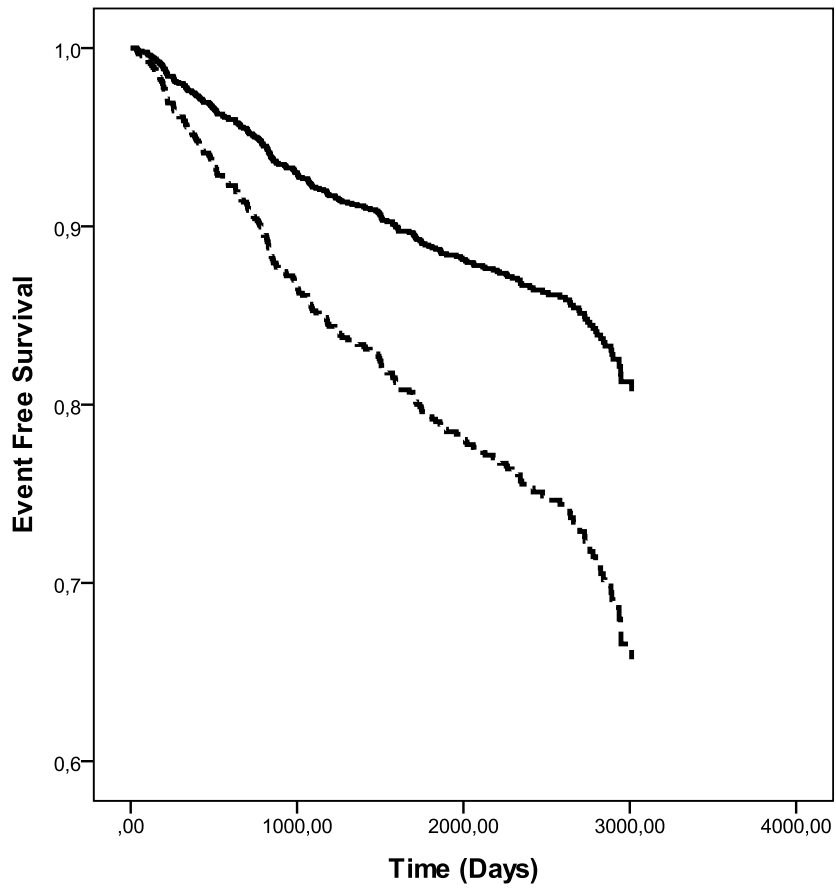

p<0.001

<sup>1</sup>Solid line indicates vWF <190UI/dL; Dash line indicates vWF ≥190 UI/dL.

(B) Stroke<sup>1</sup>.

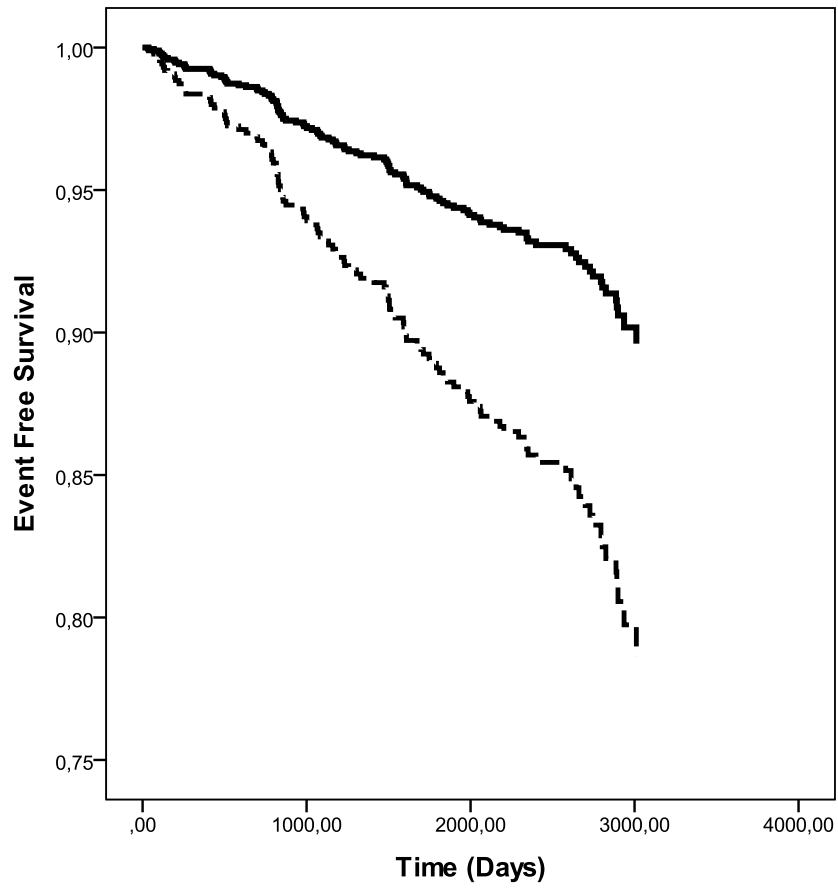

p<0.001

<sup>1</sup>Solid line indicates vWF <194UI/dL; Dash line indicates vWF ≥194 UI/dL.

(C) Total mortality<sup>1</sup>.

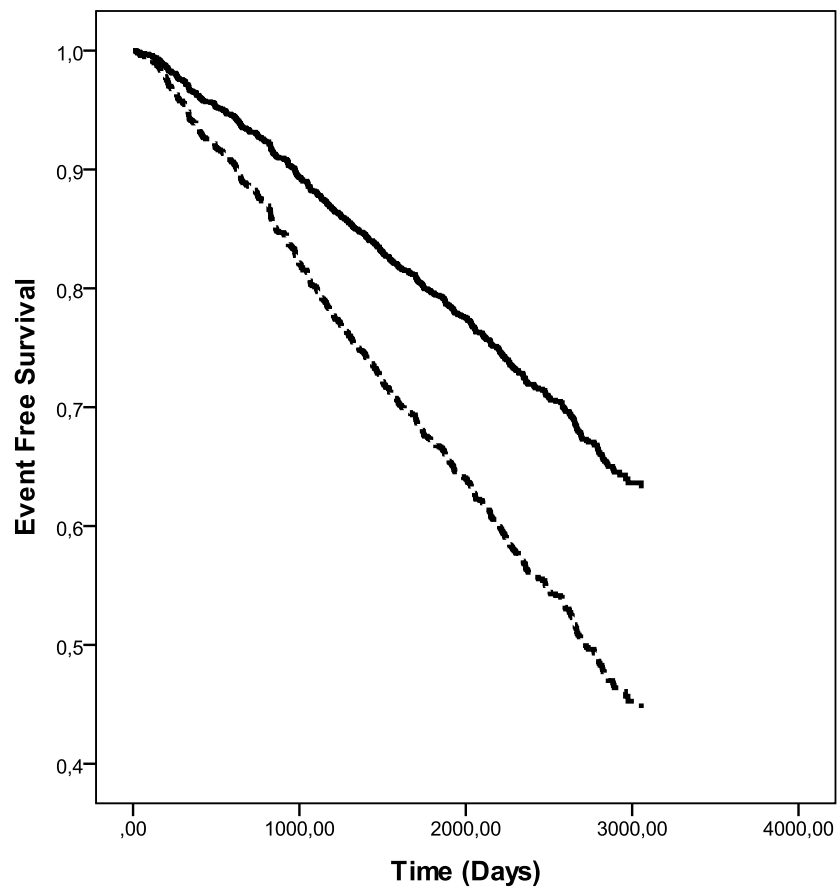

p<0.001

<sup>1</sup>Solid line indicates vWF <184UI/dL; Dash line indicates vWF ≥184 UI/dL.

(D) Cardiovascular mortality<sup>1</sup>.

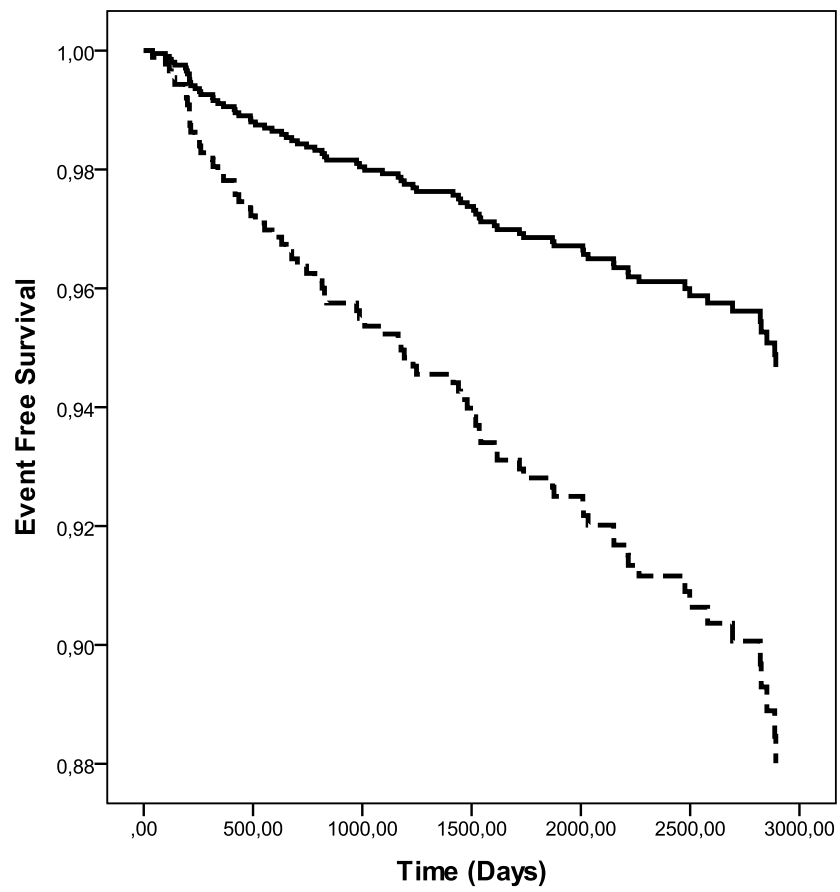

p<0.001

<sup>1</sup>Solid line indicates vWF <184UI/dL; Dash line indicates vWF ≥184 UI/dL.

(E) Major bleeding<sup>1</sup>.

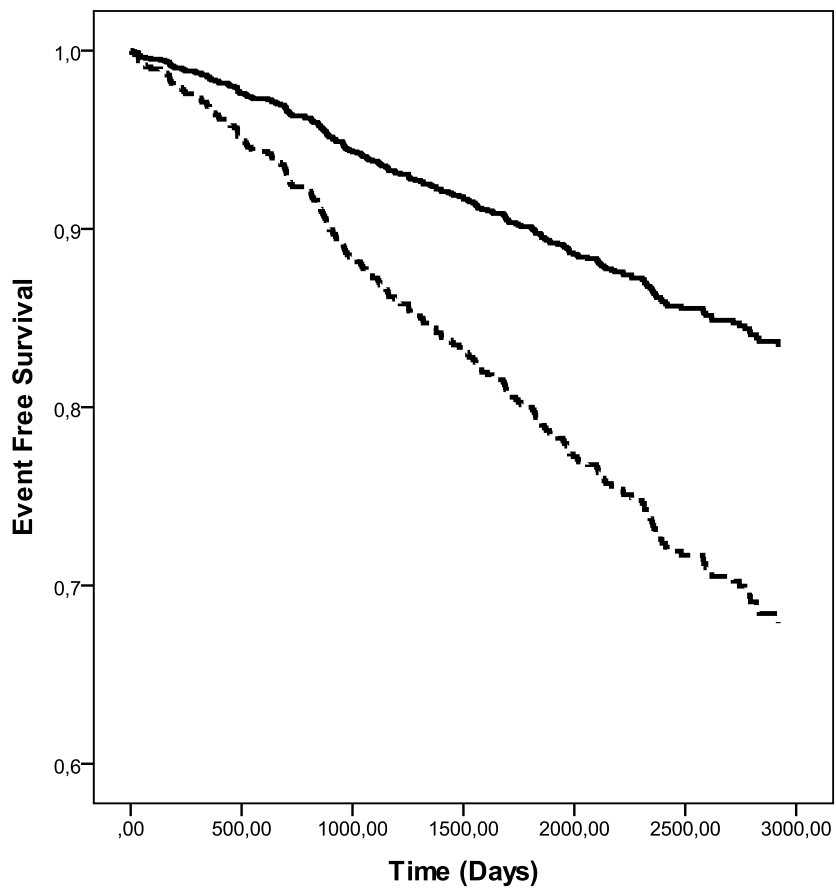

p<0.001

<sup>1</sup>Solid line indicates vWF <197UI/dL; Dash line indicates vWF ≥197 UI/dL.
